# Supplementary material for: Negative Dielectric Anisotropy Liquid Crystal with Improved Photo-Stability, Anti-Flicker, and Transmittance for 8K Display Applications
Source: MDPI journal article supplement (doi:10.3390/molecules27217150), 2022-10-22
Supplement: s1 [file s1]

# Support information

## Negative dielectric anisotropy liquid crystal with improved photo-stability, anti-Flicker, and transmittance for 8K display applications

Haiguang Chen<sup>1,2,3</sup>, Youran Liu<sup>2,3</sup>, Maoxian Chen<sup>2,3</sup>, Tianmeng Jiang<sup>2,3</sup>, Zhou Yang<sup>1,\*</sup>, Huai Yang<sup>4,5,\*</sup>

<sup>1</sup> School of Materials Science and Engineering, University of Science and Technology Beijing, China.

<sup>2</sup> Beijing Bayi Space Liquid Crystal Material Technology Company.

<sup>3</sup> Beijing Key Laboratory of Liquid Crystal Materials Analysis and Application Technology, Beijing, China.

<sup>4</sup> Department of Materials Science and Engineering, College of Engineering, Peking University, Beijing, China.

<sup>5</sup> Key Laboratory of Polymer Chemistry and Physics of Ministry of Education, Peking University, Beijing, China

\* Correspondence: [yangz@ustb.edu.cn](mailto:yangz@ustb.edu.cn) (Z.Y); [yanghuai@pku.edu.cn](mailto:yanghuai@pku.edu.cn) (H.Y); Tel.: 01062333759 (Z.Y); 010-62766919 (H.Y)

**Table S1.** Composition and content of liquid crystal A

| Enty | Structural                                                                          | Content (%) |
|------|-------------------------------------------------------------------------------------|-------------|
| 1    | 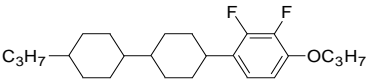   | 7           |
| 2    |    | 6           |
| 3    |    | 8           |
| 4    |    | 8           |
| 5    |    | 8           |
| 6    |   | 7           |
| 7    |  | 6           |
| 8    |  | 9           |
| 9    |  | 25          |
| 10   |  | 16          |

**Table S2.** The structure of Type B negative dielectric anisotropy compounds.

| Enty | Structural                                                                         |
|------|------------------------------------------------------------------------------------|
| b1   | 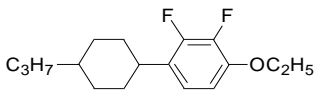 |
| b2   |  |
| b3   |  |

**Table S3.** The structure of Type C negative dielectric anisotropy compounds.

| Enty | Structural                                                                           |
|------|--------------------------------------------------------------------------------------|
| c1   | 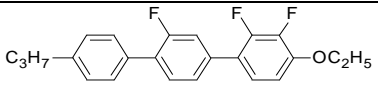  |
| c2   |  |
| c3   |  |

**Table S4.** The structure of Type D negative dielectric anisotropy compounds.

| Enty | Structural                                                                           |
|------|--------------------------------------------------------------------------------------|
| d1   | 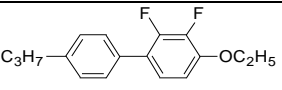 |
| d2   |  |
| d3   |  |
| d4   |  |

**Table S5.** The structure of Type E negative dielectric anisotropy compounds.

| Enty | Structural                                                                           |
|------|--------------------------------------------------------------------------------------|
| e1   | 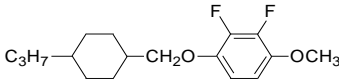   |
| e2   |    |
| e3   |    |
| e4   |    |
| e5   |    |
| e6   |   |
| e7   |  |

**Table S6.** The structure of Type F negative dielectric anisotropy compounds.

| Enty | Structural                                                                           |
|------|--------------------------------------------------------------------------------------|
| f1   | 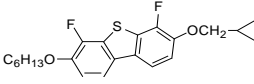 |
| f2   |  |
| f3   |  |
| f4   |  |
| f5   |  |

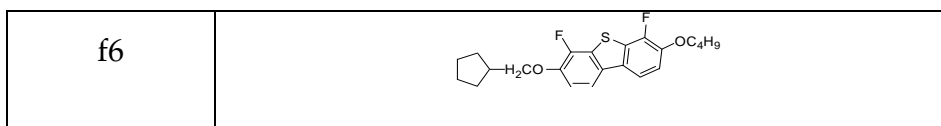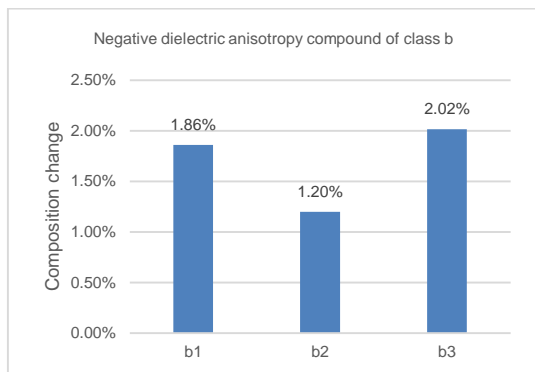

**(a)**

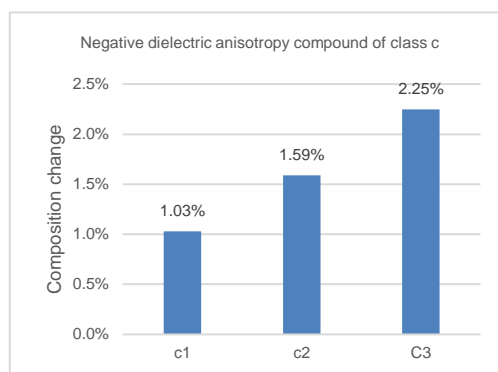

**(b)**

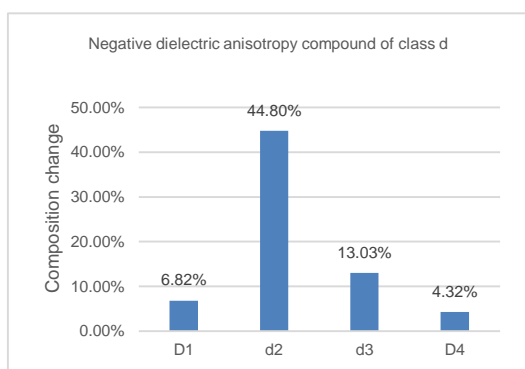

**(c)**

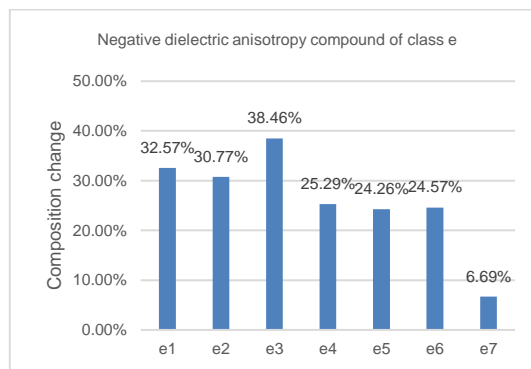

**(d)**

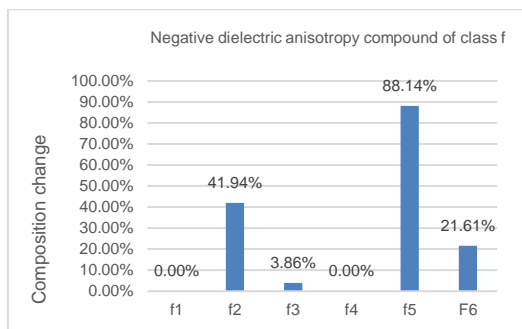

**(e)**

**Figure S1.** (a) The composition change of Type B negative dielectric anisotropy compounds. (b) The composition change of Type C negative dielectric anisotropy compounds. (c) The composition change of Type D negative dielectric anisotropy compounds. (d) The composition change of Type E

negative dielectric anisotropy compounds. (e) The composition change of Type F negative dielectric anisotropy compounds.

**Table S7.** Content of phenolic components under two conditions

|                                                       | 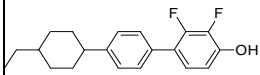 |  |  | 39.53 |
|-------------------------------------------------------|-----------------------------------------------------------------------------------|-----------------------------------------------------------------------------------|-------------------------------------------------------------------------------------|-------|
| mixed liquid<br>crystal B                             | 0.045                                                                             | 0.043                                                                             | 0.034                                                                               | 1.000 |
| mixed liquid<br>crystal B + anti-<br>light stabilizer | 0.028                                                                             | 0.029                                                                             | 0.042                                                                               | 1.000 |

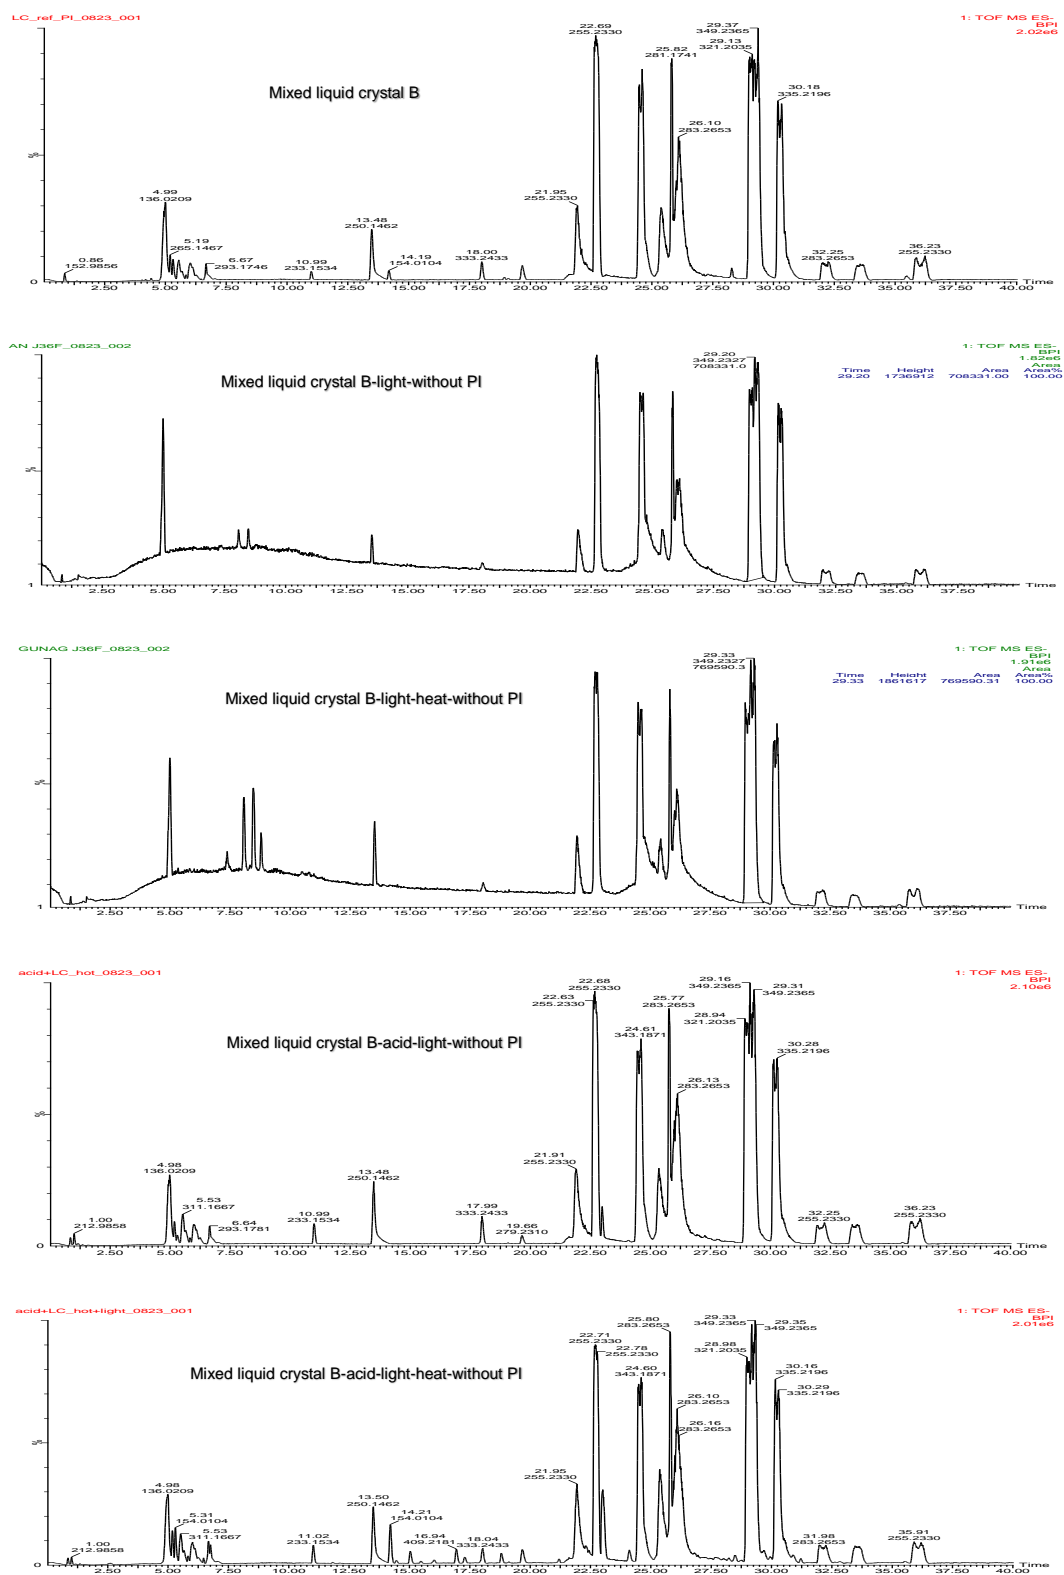

Figure S2. Content of phenols in different test environments without PI.

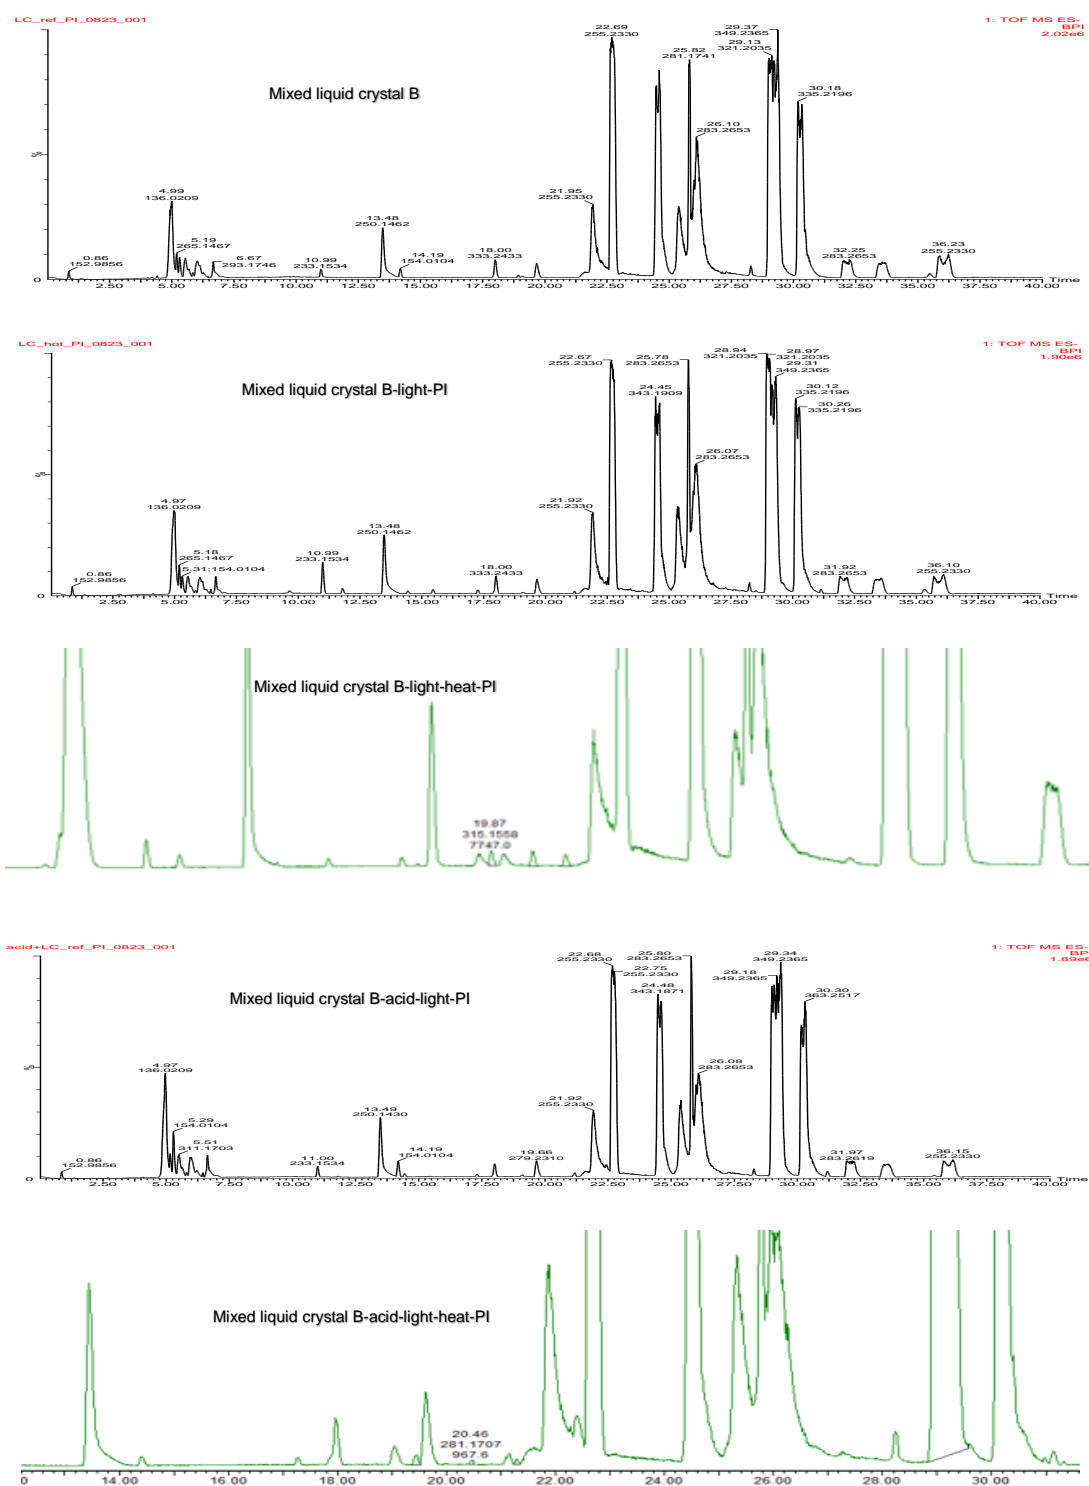

**Figure S3.** Content of phenols in different test environments with PI.



**Table S8.** Composition and content of liquid crystal C

| Enty | Structural                                                                          | Content (%) |
|------|-------------------------------------------------------------------------------------|-------------|
| 1    | 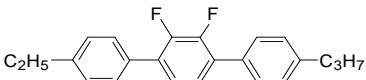   | 1.5         |
| 2    |    | 6           |
| 3    |    | 4           |
| 4    |    | 10          |
| 5    |    | 5           |
| 6    |   | 40          |
| 7    |  | 5           |
| 8    |  | 5           |
| 9    |  | 5.5         |
| 10   |  | 7           |
| 11   |  | 3           |
| 12   |  | 2           |
| 13   |  | 3           |
| 14   |  | 3           |

**Table S9.** Physical properties of mixed liquid crystal C.

| Liquid Crystal Property               |                    |        |
|---------------------------------------|--------------------|--------|
| Clear point                           | $T_{NI}$ [°C]      | 81.0   |
| Dielectric anisotropy<br>[25°C, 1kHz] | $\Delta\epsilon$   | -4.05  |
|                                       | $\epsilon_{  }$    | 3.85   |
|                                       | $\epsilon_{\perp}$ | 7.90   |
| Elastic constant [25°C]               | $K_{11}$ [pN]      | 14.60  |
|                                       | $K_{22}$ [pN]      | 7.30   |
|                                       | $K_{33}$ [pN]      | 14.40  |
| Rotary Viscosity[25°C]                | $\gamma_1$ [mPa.s] | 80.0   |
| Optical anisotropy<br>[589nm,25°C]    | $n_e$              | 1.5943 |
|                                       | $n_o$              | 1.4856 |
|                                       | $\Delta n$         | 0.1087 |

**Table S10.** Ion content of mixed liquid crystal C and D.

| Item                   | VHR/% | ION/pC |
|------------------------|-------|--------|
| Mixed liquid crystal C | 83.5  | 436.5  |
| Mixed liquid crystal D | 88.4  | 302.6  |

**Table S11.** Ion content of mixed liquid crystal D and E.

| Item                   | VHR/% | ION/pC |
|------------------------|-------|--------|
| Mixed liquid crystal D | 88.4  | 302.6  |
| Mixed liquid crystal E | 88.2  | 302.8  |

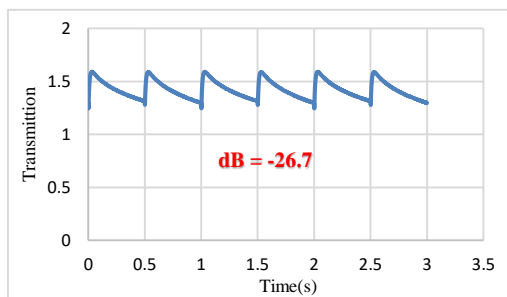

(a)

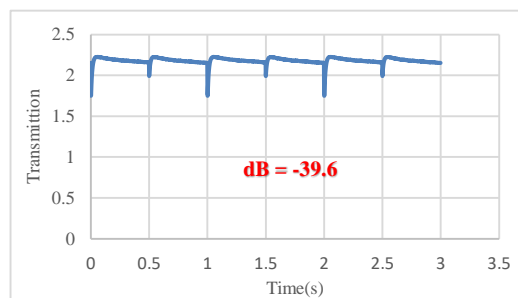

(b)

**Figure S4.** (a) Transmission and Flicker of liquid crystal D. (b) Transmission and Flicker of liquid crystal E

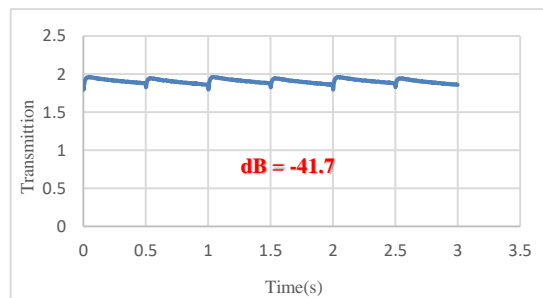

**Figure S5.** Transmission and Flicker of liquid crystal F

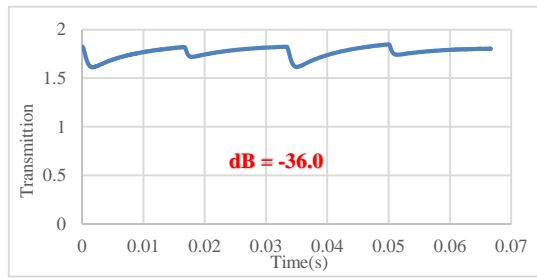

(a)

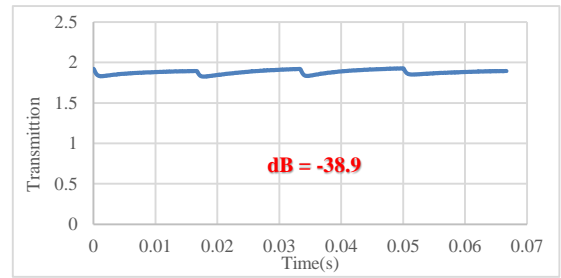

(b)

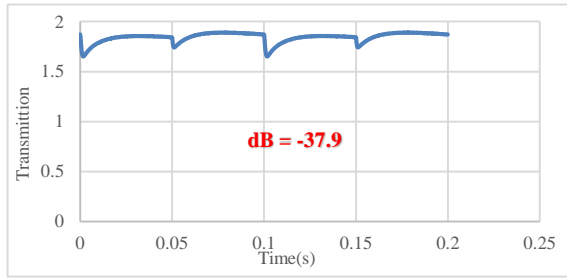

(c)

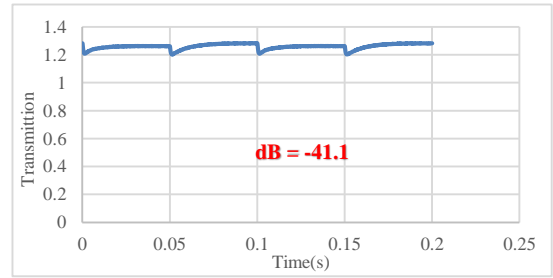

(d)

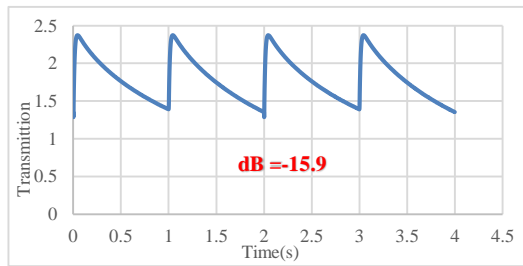

(e)

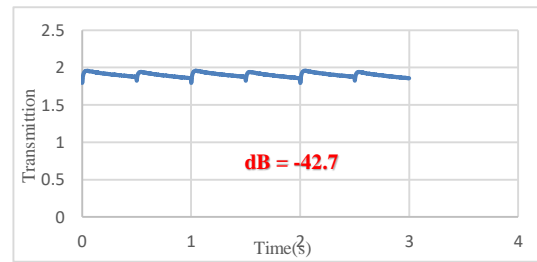

(f)

Figure S6. (a) Transmission and Flicker of mixed liquid crystal C at 30Hz . (b) Transmission and Flicker of mixed liquid crystal G at 30Hz. (c) Transmission and Flicker of mixed liquid crystal C at 10Hz . (d) Transmission and Flicker of mixed liquid crystal G at 10Hz. (e) Transmission and Flicker of mixed liquid crystal C at 0.5Hz . (f) Transmission and Flicker of mixed liquid crystal G at 0.5Hz.

**Table S12.** Relationship between Structure and performance of Liquid Crystal

| parameters | Adjustment   | Monomer structure                       |
|------------|--------------|-----------------------------------------|
| $\gamma_1$ | $\uparrow$   | Cyclohexane, Long carbon chain          |
|            | $\downarrow$ | Phenyl, Dioxane, Alkenyl, Linking group |
| K11        | $\uparrow$   | Cyclohexane, Polycyclic                 |
|            | $\downarrow$ | Phenyl                                  |
| K22        | $\uparrow$   | Cyclohexane, Polycyclic                 |
|            | $\downarrow$ | Phenyl                                  |
| K33        | $\uparrow$   | Cyclohexane, Polycyclic, Alkenyl        |
|            | $\downarrow$ | Phenyl                                  |

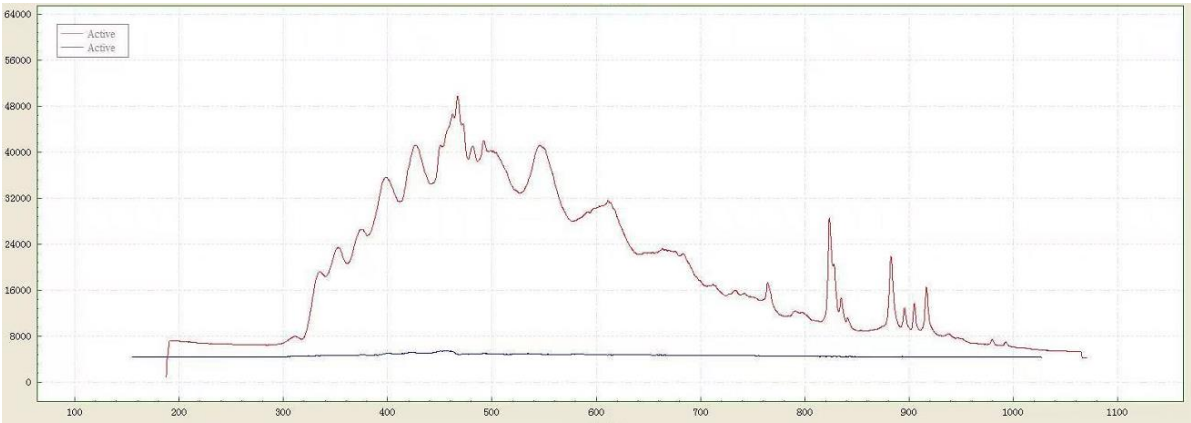

Figure S7. The spectral of the backlight.
